# Supplementary material for: Effect of a four-week ketogenic diet on exercise metabolism in CrossFit-trained athletes
Source: PubMed Central journal article supplement (PMC6451242; doi:10.1186/s12970-019-0284-9), 2019-04-05
Supplement: 12970_2019_284_MOESM1_ESM.pdf [file 12970_2019_284_MOESM1_ESM.pdf]

**Supplementary Table S1.** Detailed nutritional value of customary and ketogenic diets.

|                                        |                | Females      | Males       |
|----------------------------------------|----------------|--------------|-------------|
| Dietary fiber (g·day <sup>-1</sup> )   | Customary diet | 32.8 ± 11.0  | 34.7 ± 6.9  |
|                                        | Ketogenic diet | 9.9 ± 2.2*   | 8.9 ± 1.6*  |
| Cholesterol (mg·day <sup>-1</sup> )    | Customary diet | 491 ± 292    | 497 ± 318   |
|                                        | Ketogenic diet | 670 ± 509    | 637 ± 282   |
| Sucrose (g·day <sup>-1</sup> )         | Customary diet | 43.2 ± 10.5  | 37.3 ± 11.2 |
|                                        | Ketogenic diet | 2.3 ± 0.9*   | 2.0 ± 1.1*  |
| Ca (mg·day <sup>-1</sup> )             | Customary diet | 810 ± 387    | 866 ± 406   |
|                                        | Ketogenic diet | 1067 ± 232   | 1294 ± 450* |
| Fe (mg·day <sup>-1</sup> )             | Customary diet | 13.4 ± 2.2   | 13.8 ± 1.8  |
|                                        | Ketogenic diet | 14.1 ± 2.8   | 15.8 ± 4.9  |
| Na (mg·day <sup>-1</sup> )             | Customary diet | 1646 ± 556   | 1457 ± 873  |
|                                        | Ketogenic diet | 1796 ± 539   | 2118 ± 826  |
| K (mg·day <sup>-1</sup> )              | Customary diet | 3297 ± 1300  | 3678 ± 1311 |
|                                        | Ketogenic diet | 2883 ± 536   | 2959 ± 518  |
| P (mg·day <sup>-1</sup> )              | Customary diet | 1248 ± 408   | 1674 ± 425  |
|                                        | Ketogenic diet | 1769 ± 539*  | 1981 ± 383  |
| Mg (mg·day <sup>-1</sup> )             | Customary diet | 345 ± 93     | 435 ± 187   |
|                                        | Ketogenic diet | 245 ± 49*    | 249 ± 58*   |
| Zn (mg·day <sup>-1</sup> )             | Customary diet | 9.4 ± 1.9    | 10.7 ± 2.1  |
|                                        | Ketogenic diet | 14.2 ± 2.9*  | 15.8 ± 3.5* |
| Vitamin A (µg·day <sup>-1</sup> )      | Customary diet | 1631 ± 863   | 1386 ± 1047 |
|                                        | Ketogenic diet | 2268 ± 716   | 2486 ± 745* |
| Thiamine (mg·day <sup>-1</sup> )       | Customary diet | 0.6 ± 0.2    | 0.9 ± 0.4   |
|                                        | Ketogenic diet | 1.6 ± 0.7*   | 1.5 ± 0.6*  |
| Riboflavin (mg·day <sup>-1</sup> )     | Customary diet | 1.2 ± 0.4    | 1.4 ± 0.6   |
|                                        | Ketogenic diet | 2.5 ± 0.4*   | 3.1 ± 0.7*  |
| Vitamin C (mg·day <sup>-1</sup> )      | Customary diet | 110 ± 27     | 207 ± 352   |
|                                        | Ketogenic diet | 178 ± 75*    | 229 ± 86    |
| Vitamin D (µg·day <sup>-1</sup> )      | Customary diet | 9.3 ± 4.2    | 9.7 ± 6.0   |
|                                        | Ketogenic diet | 17.6 ± 9.5*  | 17.6 ± 12.3 |
| Vitamin E (mg·day <sup>-1</sup> )      | Customary diet | 16.8 ± 13.2  | 20.4 ± 12.5 |
|                                        | Ketogenic diet | 29.5 ± 13.6* | 29.6 ± 12.2 |
| Niacin (mg·day <sup>-1</sup> )         | Customary diet | 23.5 ± 12.1  | 27.3 ± 10.5 |
|                                        | Ketogenic diet | 23.0 ± 8.7   | 31.8 ± 9.3  |
| Pyridoxine (mg·day <sup>-1</sup> )     | Customary diet | 2.6 ± 0.5    | 2.8 ± 1.2   |
|                                        | Ketogenic diet | 2.4 ± 0.9    | 2.7 ± 0.9   |
| Folate (µg·day <sup>-1</sup> )         | Customary diet | 252 ± 83     | 249 ± 106   |
|                                        | Ketogenic diet | 637 ± 200*   | 628 ± 117*  |
| Cyanocobalamin (mg·day <sup>-1</sup> ) | Customary diet | 0.7 ± 0.2    | 0.7 ± 0.2   |
|                                        | Ketogenic diet | 11.7 ± 6.8*  | 11.9 ± 3.0* |

Values are expressed as means ± SD. \* significantly different from customary diet ( $p < 0.05$ )
